# Supplementary material
Source: Springer Nature journal article supplement (https://www.springermedizin.de/resource/supplementary/12961_2005_24_MOESM5_ESM.pdf/9571310)

reg10==1

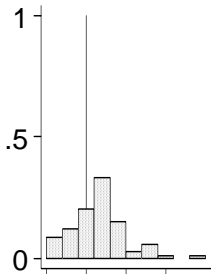

reg10==2

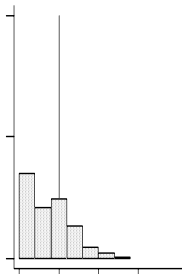

reg10==3

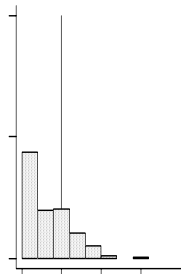

reg10==4

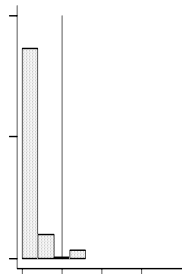

reg10==5

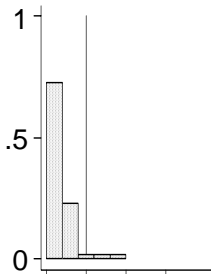

reg10==6

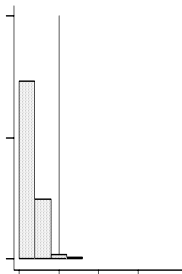

reg10==7

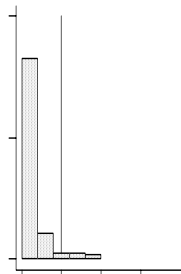

reg10==8

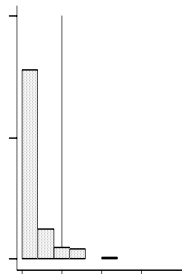

reg10==9

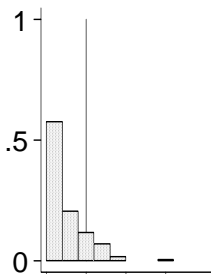

reg10==10

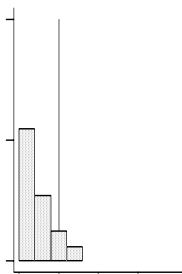

F-fraction

Supplement: MOESM5 [file 9571310]
